# Supplementary material for: Shiga toxin sub-type 2a increases the efficiency of Escherichia coli O157 transmission between animals and restricts epithelial regeneration in bovine enteroids
Source: PLoS Pathog. 2019 Oct 3;15(10):e1008003. doi: 10.1371/journal.ppat.1008003 (PMC6776261; doi:10.1371/journal.ppat.1008003)
Supplement: S1 Table — (XLSX) [file ppat.1008003.s007.xlsx]

## Sheet: Genes unique in strain 9000
Gene	Non-unique Gene name	Annotation	No. isolates	No. sequences	Avg sequences per isolate	Genome Fragment	Order within Fragment	Accessory Fragment	Accessory Order with Fragment	QC	Min group size nuc	Max group size nuc	Avg group size nuc	10671_pub.gbf	9000_pub.gbf	9000 Coordinates	10671 Coordinates
BFL16_RS00215		L-carnitine/gamma-butyrobetaine antiporter	1	1	1	1	3225	62	1		1514	1514	1514		BFL16_RS00215.p01	44824-46338	-
BFL16_RS00900		hypothetical protein	1	1	1	1	3184	19	1		209	209	209		BFL16_RS00900.p01	188280-188489	-
BFL16_RS01660		septation initiation protein	1	1	1	1	3483	69	1		752	752	752		BFL16_RS01660.p01	320377-321129	-
BFL16_RS01780		usher protein EcpC	1	1	1	1	3505	64	1		2525	2525	2525		BFL16_RS01780.p01	343090-345615	-
BFL16_RS01825		IS66 family insertion sequence hypothetical protein	1	1	1	1	3514	10	1		380	380	380		BFL16_RS01825.p01	349324-349704	-
BFL16_RS02155		carbonic anhydrase	1	1	1	1	3573	34	1		659	659	659		BFL16_RS02155.p01	419450-420109	-
BFL16_RS02970		Ig-like domain repeat protein	1	1	1	1	3180	35	1		4385	4385	4385		BFL16_RS02970.p01	585228-589613	-
BFL16_RS05395		integrase	1	1	1	1	4630	65	1		1223	1223	1223		BFL16_RS05395.p01	1058979-1060202	-
BFL16_RS05410		hypothetical protein	1	1	1	1	4888	96	2		698	698	698		BFL16_RS05410.p01	1061298-1061996	-
BFL16_RS05415		hypothetical protein	1	1	1	1	4887	96	1		185	185	185		BFL16_RS05415.p01	1061989-1062174	-
BFL16_RS05425		hypothetical protein	1	1	1	1	4637	53	1		242	242	242		BFL16_RS05425.p01	1062355-1062597	-
BFL16_RS05435		DNA primase	1	1	1	1	4636	120	7		1754	1754	1754		BFL16_RS05435.p01	1062899-1064653	-
BFL16_RS05440		hypothetical protein	1	1	1	1	4635	120	6		251	251	251		BFL16_RS05440.p01	1064940-1065191	-
BFL16_RS05445		hypothetical protein	1	1	1	1	4623	120	5		194	194	194		BFL16_RS05445.p01	1065322-1065516	-
BFL16_RS05450		hypothetical protein	1	1	1	1	4624	120	4		161	161	161		BFL16_RS05450.p01	1065520-1065681	-
BFL16_RS05455		terminase small subunit	1	1	1	1	4625	120	3		488	488	488		BFL16_RS05455.p01	1065813-1066301	-
BFL16_RS05460		phage capsid protein	1	1	1	1	4626	120	2		923	923	923		BFL16_RS05460.p01	1066464-1067387	-
BFL16_RS05465		hypothetical protein	1	1	1	1	4627	120	1		197	197	197		BFL16_RS05465.p01	1067912-1068109	-
BFL16_RS05960		integrase	1	1	1	1	4397	48	1		1019	1019	1019		BFL16_RS05960.p01	1175557-1176576	-
BFL16_RS06260		phage tail tape measure protein	1	1	1	1	4332	100	1		2579	2579	2579		BFL16_RS06260.p01	1210729-1213308	-
BFL16_RS06265		tail protein	1	1	1	1	4333	100	3		329	329	329		BFL16_RS06265.p01	1213305-1213634	-
BFL16_RS06270		phage minor tail protein L	1	1	1	1	4334	100	2		698	698	698		BFL16_RS06270.p01	1213634-1214332	-
BFL16_RS06305		tail fiber protein	1	1	1	1	4337	81	1		1313	1313	1313		BFL16_RS06305.p01	1220721-1222034	-
BFL16_RS06310		phage tail protein	1	1	1	1	4336	81	2		269	269	269		BFL16_RS06310.p01	1222036-1222305	-
BFL16_RS07180		hypothetical protein	1	1	1	1	4315	123	1		194	194	194		BFL16_RS07180.p01	1376756-1376950	-
BFL16_RS07185		AlpA family phage regulatory protein	1	1	1	1	4314	123	2		197	197	197		BFL16_RS07185.p01	1377016-1377213	-
BFL16_RS07190		glucosyl transferase	1	1	1	1	4313	123	3		1124	1124	1124		BFL16_RS07190.p01	1377924-1379048	-
BFL16_RS07195		esterase family protein	1	1	1	1	4312	123	4		284	284	284		BFL16_RS07195.p01	1379190-1379474	-
BFL16_RS07215		hypothetical protein	1	1	1	1	4288	123	5		458	458	458		BFL16_RS07215.p01	1380402-1380860	-
BFL16_RS07220		hypothetical protein	1	1	1	1	4289	123	6		191	191	191		BFL16_RS07220.p01	1380925-1381116	-
BFL16_RS07230		transposase	1	1	1	1	4290	123	7		248	248	248		BFL16_RS07230.p01	1381308-1381556	-
BFL16_RS07235		IS66 family insertion sequence hypothetical protein	1	1	1	1	4291	123	8		425	425	425		BFL16_RS07235.p01	1381610-1382035	-
BFL16_RS07240		hypothetical protein	1	1	1	1	4292	123	9		182	182	182		BFL16_RS07240.p01	1382335-1382517	-
BFL16_RS08070		phage portal protein	1	1	1	1	4639	124	2		2579	2579	2579		BFL16_RS08070.p01	1506497-1509076	-
BFL16_RS08075		phage gp6-like head-tail connector protein	1	1	1	1	4640	124	3		326	326	326		BFL16_RS08075.p01	1509079-1509405	-
BFL16_RS08080		head-tail adaptor protein	1	1	1	1	4641	124	4		350	350	350		BFL16_RS08080.p01	1509415-1509765	-
BFL16_RS08085		hypothetical protein	1	1	1	1	4642	124	5		446	446	446		BFL16_RS08085.p01	1509762-1510208	-
BFL16_RS08090		DUF3168 domain-containing protein	1	1	1	1	4643	124	6		344	344	344		BFL16_RS08090.p01	1510205-1510549	-
BFL16_RS08095		tail protein	1	1	1	1	4644	124	7		716	716	716		BFL16_RS08095.p01	1510615-1511331	-
BFL16_RS08100		tail assembly protein	1	1	1	1	4645	124	8		374	374	374		BFL16_RS08100.p01	1511346-1511720	-
BFL16_RS08105		phage tail protein	1	1	1	1	4646	124	9		281	281	281		BFL16_RS08105.p01	1511744-1512025	-
BFL16_RS08110		phage tail tape measure protein	1	1	1	1	4647	124	10		3242	3242	3242		BFL16_RS08110.p01	1512073-1515315	-
BFL16_RS08115		tail protein	1	1	1	1	4648	124	1		341	341	341		BFL16_RS08115.p01	1515308-1515649	-
BFL16_RS08180		transposase	1	1	1	1	4638	38	1		299	299	299		BFL16_RS08180.p01	1527236-1527535	-
BFL16_RS08455		lysozyme	1	1	1	1	89	14	1		476	476	476		BFL16_RS08455.p01	1562580-1563056	-
BFL16_RS08465		lipoprotein bor	1	1	1	1	125	75	1		293	293	293		BFL16_RS08465.p01	1563546-1563839	-
BFL16_RS08630		class I SAM-dependent methyltransferase	1	1	1	1	88	2	1		584	584	584		BFL16_RS08630.p01	1591540-1592124	-
BFL16_RS09235		exonuclease	1	1	1	1	255	59	1		2471	2471	2471		BFL16_RS09235.p01	1694667-1697138	-
BFL16_RS09290		Rha family transcriptional regulator	1	1	1	1	277	44	1		425	425	425		BFL16_RS09290.p01	1700378-1700803	-
BFL16_RS09475		hypothetical protein	1	1	1	1	4832	54	1		221	221	221		BFL16_RS09475.p01	1719556-1719777	-
BFL16_RS09520		phage tail tape measure protein	1	1	1	1	4819	18	1		3080	3080	3080		BFL16_RS09520.p01	1725287-1728367	-
BFL16_RS09885		multidrug efflux RND transporter permease subunit	1	1	1	1	4757	31	1		3083	3083	3083		BFL16_RS09885.p01	1790493-1793576	-
BFL16_RS10010		carbohydrate ABC transporter substrate-binding protein	1	1	1	1	4653	89	2		629	629	629		BFL16_RS10010.p01	1816158-1816787	-
BFL16_RS10015		sugar ABC transporter substrate-binding protein	1	1	1	1	4731	89	1		614	614	614		BFL16_RS10015.p01	1816836-1817450	-
BFL16_RS10415		50S ribosomal protein L7/L12-serine acetyltransferase	1	1	1	1	4655	95	2		296	296	296		BFL16_RS10415.p01	1900512-1900808	-
BFL16_RS10690		sulfate ABC transporter substrate-binding protein	1	1	1	1	5200	85	2		587	587	587		BFL16_RS10690.p01	1952905-1953492	-
BFL16_RS10695		formate dehydrogenase-N subunit alpha	1	1	1	1	5157	85	1		2411	2411	2411		BFL16_RS10695.p01	1953541-1955952	-
BFL16_RS11015		transcriptional regulator FtrA	1	1	1	1	5259	56	1		974	974	974		BFL16_RS11015.p01	2023352-2024326	-
BFL16_RS11085		peptidase M85	1	1	1	1	5270	86	2		986	986	986		BFL16_RS11085.p01	2034820-2035806	-
BFL16_RS11090		hypothetical protein	1	1	1	1	5271	86	1		191	191	191		BFL16_RS11090.p01	2035835-2036026	-
BFL16_RS11100		phage tail protein	1	1	1	1	5393	118	5		1313	1313	1313		BFL16_RS11100.p01	2036507-2037820	-
BFL16_RS11105		Ail/Lom family protein	1	1	1	1	5392	118	4		599	599	599		BFL16_RS11105.p01	2037885-2038484	-
BFL16_RS11115		tail assembly protein	1	1	1	1	5391	118	3		677	677	677		BFL16_RS11115.p01	2042273-2042950	-
BFL16_RS11120		tail protein	1	1	1	1	5390	118	2		743	743	743		BFL16_RS11120.p01	2042848-2043591	-
BFL16_RS11125		phage minor tail protein L	1	1	1	1	5389	118	1		698	698	698		BFL16_RS11125.p01	2043602-2044300	-
BFL16_RS11140		phage tail assembly protein T	1	1	1	1	5382	79	1		308	308	308		BFL16_RS11140.p01	2047315-2047623	-
BFL16_RS11145		phage minor tail protein G	1	1	1	1	5381	79	2		422	422	422		BFL16_RS11145.p01	2047650-2048072	-
BFL16_RS11155		tail protein	1	1	1	1	5378	52	1		398	398	398		BFL16_RS11155.p01	2048846-2049244	-
BFL16_RS11165		DNA breaking-rejoining protein	1	1	1	1	5275	102	1		281	281	281		BFL16_RS11165.p01	2049883-2050164	-
BFL16_RS11170		DUF2190 domain-containing protein	1	1	1	1	5274	102	3		326	326	326		BFL16_RS11170.p01	2050157-2050483	-
BFL16_RS11175		peptidase S14	1	1	1	1	5276	102	2		1955	1955	1955		BFL16_RS11175.p01	2050571-2052526	-
BFL16_RS11185		hypothetical protein	1	1	1	1	5372	103	2		236	236	236		BFL16_RS11185.p01	2054042-2054278	-
BFL16_RS11190		hypothetical protein	1	1	1	1	5371	103	3		2123	2123	2123		BFL16_RS11190.p01	2054251-2056374	-
BFL16_RS11195		DUF1441 domain-containing protein	1	1	1	1	5370	103	1		476	476	476		BFL16_RS11195.p01	2056371-2056847	-
BFL16_RS11215		lysis protein	1	1	1	1	5366	117	1		467	467	467		BFL16_RS11215.p01	2057514-2057981	-
BFL16_RS11220		lysozyme	1	1	1	1	5365	117	2		533	533	533		BFL16_RS11220.p01	2058280-2058813	-
BFL16_RS11225		holin	1	1	1	1	5364	117	3		215	215	215		BFL16_RS11225.p01	2058818-2059033	-
BFL16_RS11230		DUF826 domain-containing protein	1	1	1	1	5363	117	5		245	245	245		BFL16_RS11230.p01	2059111-2059356	-
BFL16_RS11235		DUF1378 domain-containing protein	1	1	1	1	5362	117	4		179	179	179		BFL16_RS11235.p01	2059397-2059576	-
BFL16_RS11250		site-specific DNA-methyltransferase	1	1	1	1	5360	130	11		1058	1058	1058		BFL16_RS11250.p01	2062164-2063222	-
BFL16_RS11255		hypothetical protein	1	1	1	1	5359	130	12		197	197	197		BFL16_RS11255.p01	2063373-2063570	-
BFL16_RS11260		antitermination protein	1	1	1	1	5358	130	13		821	821	821		BFL16_RS11260.p01	2063797-2064618	-
BFL16_RS11265		RusA family crossover junction endodeoxyribonuclease	1	1	1	1	5357	130	14		374	374	374		BFL16_RS11265.p01	2064615-2064989	-
BFL16_RS11270		DUF968 domain-containing protein	1	1	1	1	5356	130	15		1049	1049	1049		BFL16_RS11270.p01	2065002-2066051	-
BFL16_RS11275		hypothetical protein	1	1	1	1	5130	130	16		272	272	272		BFL16_RS11275.p01	2066053-2066325	-
BFL16_RS11285		type II restriction endonuclease NgoMIV	1	1	1	1	5131	130	17		878	878	878		BFL16_RS11285.p01	2066496-2067374	-
BFL16_RS11290		DNA (cytosine-5-)-methyltransferase	1	1	1	1	5132	130	18		1118	1118	1118		BFL16_RS11290.p01	2067388-2068506	-
BFL16_RS11295		hypothetical protein	1	1	1	1	5133	130	19		665	665	665		BFL16_RS11295.p01	2068691-2069356	-
BFL16_RS11300		DUF977 domain-containing protein	1	1	1	1	5134	130	20		425	425	425		BFL16_RS11300.p01	2069531-2069956	-
BFL16_RS11305		DUF1627 domain-containing protein	1	1	1	1	5135	130	21		770	770	770		BFL16_RS11305.p01	2069972-2070742	-
BFL16_RS11310		DNA replication protein DnaC	1	1	1	1	5136	130	22		746	746	746		BFL16_RS11310.p01	2070764-2071510	-
BFL16_RS11315		DNA-binding protein	1	1	1	1	5137	130	23		962	962	962		BFL16_RS11315.p01	2071517-2072479	-
BFL16_RS11320		Rha family transcriptional regulator	1	1	1	1	5138	130	24		425	425	425		BFL16_RS11320.p01	2072502-2072927	-
BFL16_RS11325		hypothetical protein	1	1	1	1	5139	130	25		281	281	281		BFL16_RS11325.p01	2072911-2073192	-
BFL16_RS11330		hypothetical protein	1	1	1	1	5140	130	10		419	419	419		BFL16_RS11330.p01	2073293-2073712	-
BFL16_RS11340		DUF1391 domain-containing protein	1	1	1	1	5141	130	9		155	155	155		BFL16_RS11340.p01	2073978-2074133	-
BFL16_RS11345		hypothetical protein	1	1	1	1	5142	130	8		170	170	170		BFL16_RS11345.p01	2074093-2074263	-
BFL16_RS11350		hypothetical protein	1	1	1	1	5143	130	7		218	218	218		BFL16_RS11350.p01	2074293-2074511	-
BFL16_RS11355		hypothetical protein	1	1	1	1	5144	130	6		374	374	374		BFL16_RS11355.p01	2074534-2074908	-
BFL16_RS11365		cell division inhibitor	1	1	1	1	5145	130	5		188	188	188		BFL16_RS11365.p01	2075428-2075616	-
BFL16_RS11375		exodeoxyribonuclease VIII	1	1	1	1	5146	130	4		2396	2396	2396		BFL16_RS11375.p01	2075896-2078292	-
BFL16_RS11380		DNA-binding protein	1	1	1	1	5147	130	3		251	251	251		BFL16_RS11380.p01	2078365-2078616	-
BFL16_RS11385		integrase	1	1	1	1	5148	130	2		1295	1295	1295		BFL16_RS11385.p01	2078636-2079931	-
BFL16_RS11390		DNA damage-inducible protein DinI	1	1	1	1	5149	130	1		242	242	242		BFL16_RS11390.p01	2080109-2080351	-
BFL16_RS11425		Ail/Lom family protein	1	1	1	1	5123	47	1		599	599	599		BFL16_RS11425.p01	2084186-2084785	-
BFL16_RS11435		tail assembly protein	1	1	1	1	5118	107	1		677	677	677		BFL16_RS11435.p01	2088573-2089250	-
BFL16_RS11440		tail protein	1	1	1	1	5117	107	2		743	743	743		BFL16_RS11440.p01	2089148-2089891	-
BFL16_RS11445		phage minor tail protein L	1	1	1	1	5116	107	3		698	698	698		BFL16_RS11445.p01	2089902-2090600	-
BFL16_RS11470		tail protein	1	1	1	1	5109	15	1		752	752	752		BFL16_RS11470.p01	2094395-2095147	-
BFL16_RS11565		DUF1327 domain-containing protein	1	1	1	1	26	132	1		344	344	344		BFL16_RS11565.p01	2107381-2107725	-
BFL16_RS11570		holin	1	1	1	1	25	132	2		206	206	206		BFL16_RS11570.p01	2107730-2107936	-
BFL16_RS11575		hypothetical protein	1	1	1	1	24	132	3		161	161	161		BFL16_RS11575.p01	2107944-2108105	-
BFL16_RS11590		membrane protein	1	1	1	1	23	132	4		167	167	167		BFL16_RS11590.p01	2110548-2110715	-
BFL16_RS11595		tellurite resistance protein	1	1	1	1	22	132	5		431	431	431		BFL16_RS11595.p01	2110712-2111143	-
BFL16_RS11610		AraC family transcriptional regulator	1	1	1	1	21	132	6		587	587	587		BFL16_RS11610.p01	2111594-2112181	-
BFL16_RS11620		late gene antiterminator protein	1	1	1	1	19	132	37		554	554	554		BFL16_RS11620.p01	2112865-2113419	-
BFL16_RS11625		endodeoxyribonuclease	1	1	1	1	18	132	36		305	305	305		BFL16_RS11625.p01	2113482-2113787	-
BFL16_RS11630		DUF968 domain-containing protein	1	1	1	1	17	132	35		1049	1049	1049		BFL16_RS11630.p01	2113800-2114849	-
BFL16_RS11635		hypothetical protein	1	1	1	1	16	132	34		272	272	272		BFL16_RS11635.p01	2114851-2115123	-
BFL16_RS11640		TIGR00156 family protein	1	1	1	1	15	132	33		344	344	344		BFL16_RS11640.p01	2115245-2115589	-
BFL16_RS11645		Hok/Gef family protein	1	1	1	1	14	132	32		212	212	212		BFL16_RS11645.p01	2115709-2115921	-
BFL16_RS11650		DUF551 domain-containing protein	1	1	1	1	13	132	31		557	557	557		BFL16_RS11650.p01	2116155-2116712	-
BFL16_RS11655		hypothetical protein	1	1	1	1	12	132	30		218	218	218		BFL16_RS11655.p01	2116714-2116932	-
BFL16_RS11660		hypothetical protein	1	1	1	1	11	132	29		311	311	311		BFL16_RS11660.p01	2117060-2117371	-
BFL16_RS11665		hypothetical protein	1	1	1	1	10	132	28		227	227	227		BFL16_RS11665.p01	2117364-2117591	-
BFL16_RS11670		DNA-binding protein	1	1	1	1	9	132	27		281	281	281		BFL16_RS11670.p01	2117588-2117869	-
BFL16_RS11675		DUF1627 domain-containing protein	1	1	1	1	8	132	26		716	716	716		BFL16_RS11675.p01	2117902-2118618	-
BFL16_RS11680		replication protein	1	1	1	1	7	132	25		662	662	662		BFL16_RS11680.p01	2118652-2119314	-
BFL16_RS11685		hypothetical protein	1	1	1	1	6	132	24		200	200	200		BFL16_RS11685.p01	2120007-2120207	-
BFL16_RS11690		Rha family transcriptional regulator	1	1	1	1	5	132	23		425	425	425		BFL16_RS11690.p01	2120218-2120643	-
BFL16_RS11695		hypothetical protein	1	1	1	1	53	132	22		242	242	242		BFL16_RS11695.p01	2120627-2120869	-
BFL16_RS11700		LexA family transcriptional repressor	1	1	1	1	54	132	21		524	524	524		BFL16_RS11700.p01	2121075-2121599	-
BFL16_RS11710		DUF1391 domain-containing protein	1	1	1	1	55	132	20		152	152	152		BFL16_RS11710.p01	2121892-2122044	-
BFL16_RS11715		hypothetical protein	1	1	1	1	56	132	19		638	638	638		BFL16_RS11715.p01	2122056-2122694	-
BFL16_RS11720		hypothetical protein	1	1	1	1	57	132	18		209	209	209		BFL16_RS11720.p01	2122695-2122904	-
BFL16_RS11725		hypothetical protein	1	1	1	1	58	132	17		260	260	260		BFL16_RS11725.p01	2122953-2123213	-
BFL16_RS11730		cell division inhibitor	1	1	1	1	59	132	16		188	188	188		BFL16_RS11730.p01	2123469-2123657	-
BFL16_RS11735		DUF1482 domain-containing protein	1	1	1	1	60	132	15		188	188	188		BFL16_RS11735.p01	2123654-2123842	-
BFL16_RS11740		exonuclease	1	1	1	1	61	132	14		1244	1244	1244		BFL16_RS11740.p01	2123935-2125179	-
BFL16_RS11745		integrase	1	1	1	1	62	132	13		551	551	551		BFL16_RS11745.p01	2125161-2125712	-
BFL16_RS11750		DNA damage-inducible protein DinI	1	1	1	1	63	132	12		242	242	242		BFL16_RS11750.p01	2125890-2126132	-
BFL16_RS11760		IS66 family insertion sequence hypothetical protein	1	1	1	1	64	132	11		380	380	380		BFL16_RS11760.p01	2127095-2127475	-
BFL16_RS11765		IS66 family insertion sequence hypothetical protein	1	1	1	1	65	132	10		347	347	347		BFL16_RS11765.p01	2127472-2127819	-
BFL16_RS11770		IS66 family transposase ISEc8	1	1	1	1	66	132	9		1538	1538	1538		BFL16_RS11770.p01	2127869-2129407	-
BFL16_RS11780		DUF1076 domain-containing protein	1	1	1	1	67	132	8		371	371	371		BFL16_RS11780.p01	2129990-2130361	-
BFL16_RS11785		hypothetical protein	1	1	1	1	68	132	7		347	347	347		BFL16_RS11785.p01	2130625-2130972	-
BFL16_RS11795		phage tail protein	1	1	1	1	5533	76	1		269	269	269		BFL16_RS11795.p01	2132040-2132309	-
BFL16_RS11800		tail fiber protein	1	1	1	1	5534	76	2		1313	1313	1313		BFL16_RS11800.p01	2132311-2133624	-
BFL16_RS11825		phage tail tape measure protein	1	1	1	1	4	30	1		3080	3080	3080		BFL16_RS11825.p01	2138793-2141873	-
BFL16_RS11845		DUF3168 domain-containing protein	1	1	1	1	46	128	13		344	344	344		BFL16_RS11845.p01	2143386-2143730	-
BFL16_RS11850		hypothetical protein	1	1	1	1	45	128	14		446	446	446		BFL16_RS11850.p01	2143727-2144173	-
BFL16_RS11855		head-tail adaptor protein	1	1	1	1	44	128	12		350	350	350		BFL16_RS11855.p01	2144170-2144520	-
BFL16_RS11860		phage gp6-like head-tail connector protein	1	1	1	1	43	128	11		326	326	326		BFL16_RS11860.p01	2144530-2144856	-
BFL16_RS11870		hypothetical protein	1	1	1	1	42	128	10		221	221	221		BFL16_RS11870.p01	2147383-2147604	-
BFL16_RS11875		phage major capsid protein	1	1	1	1	41	128	9		1937	1937	1937		BFL16_RS11875.p01	2147649-2149586	-
BFL16_RS11880		terminase large subunit	1	1	1	1	40	128	8		1661	1661	1661		BFL16_RS11880.p01	2149650-2151311	-
BFL16_RS11885		terminase small subunit	1	1	1	1	39	128	7		563	563	563		BFL16_RS11885.p01	2151308-2151871	-
BFL16_RS11890		hypothetical protein	1	1	1	1	38	128	6		143	143	143		BFL16_RS11890.p01	2152055-2152198	-
BFL16_RS11895		HNH endonuclease	1	1	1	1	37	128	5		365	365	365		BFL16_RS11895.p01	2152161-2152526	-
BFL16_RS11900		DUF3950 domain-containing protein	1	1	1	1	36	128	4		227	227	227		BFL16_RS11900.p01	2152568-2152795	-
BFL16_RS11910		lysis protein	1	1	1	1	35	128	3		467	467	467		BFL16_RS11910.p01	2153158-2153625	-
BFL16_RS11950		lysozyme	1	1	1	1	33	128	1		533	533	533		BFL16_RS11950.p01	2155932-2156465	-
BFL16_RS12085		hypothetical protein	1	1	1	1	84	1	1		218	218	218		BFL16_RS12085.p01	2171391-2171609	-
BFL16_RS13725		hypothetical protein	1	1	1	1	5526	70	1		818	818	818		BFL16_RS13725.p01	2474389-2475207	-
BFL16_RS14475		phage tail protein	1	1	1	1	2221	23	1		269	269	269		BFL16_RS14475.p01	2591688-2591957	-
BFL16_RS14490		host specificity protein J	1	1	1	1	5090	115	4		3479	3479	3479		BFL16_RS14490.p01	2594004-2597483	-
BFL16_RS14495		tail assembly protein	1	1	1	1	5089	115	3		677	677	677		BFL16_RS14495.p01	2597724-2598401	-
BFL16_RS14500		tail protein	1	1	1	1	5088	115	2		743	743	743		BFL16_RS14500.p01	2598299-2599042	-
BFL16_RS14505		phage minor tail protein L	1	1	1	1	5087	115	1		698	698	698		BFL16_RS14505.p01	2599053-2599751	-
BFL16_RS14515		phage tail tape measure protein	1	1	1	1	2273	46	1		2579	2579	2579		BFL16_RS14515.p01	2600077-2602656	-
BFL16_RS14525		phage minor tail protein G	1	1	1	1	2222	101	3		431	431	431		BFL16_RS14525.p01	2603077-2603508	-
BFL16_RS14530		tail fiber protein	1	1	1	1	2223	101	2		740	740	740		BFL16_RS14530.p01	2603522-2604262	-
BFL16_RS14535		minor capsid protein E	1	1	1	1	2224	101	1		266	266	266		BFL16_RS14535.p01	2604244-2604510	-
BFL16_RS15125		phage tail protein	1	1	1	1	5535	82	1		1313	1313	1313		BFL16_RS15125.p01	2680851-2682164	-
BFL16_RS15130		Ail/Lom family protein	1	1	1	1	5082	82	2		599	599	599		BFL16_RS15130.p01	2682229-2682828	-
BFL16_RS15145		tail protein	1	1	1	1	5080	125	2		743	743	743		BFL16_RS15145.p01	2687195-2687938	-
BFL16_RS15150		phage minor tail protein L	1	1	1	1	5079	125	3		698	698	698		BFL16_RS15150.p01	2687949-2688647	-
BFL16_RS15155		tail protein	1	1	1	1	5078	125	4		341	341	341		BFL16_RS15155.p01	2688647-2688988	-
BFL16_RS15160		phage tail tape measure protein	1	1	1	1	5077	125	5		3242	3242	3242		BFL16_RS15160.p01	2688981-2692223	-
BFL16_RS15165		phage tail protein	1	1	1	1	5076	125	6		281	281	281		BFL16_RS15165.p01	2692271-2692552	-
BFL16_RS15170		tail assembly protein	1	1	1	1	5075	125	7		374	374	374		BFL16_RS15170.p01	2692576-2692950	-
BFL16_RS15175		tail protein	1	1	1	1	5074	125	8		716	716	716		BFL16_RS15175.p01	2692965-2693681	-
BFL16_RS15180		DUF3168 domain-containing protein	1	1	1	1	5073	125	9		344	344	344		BFL16_RS15180.p01	2693747-2694091	-
BFL16_RS15185		hypothetical protein	1	1	1	1	5072	125	10		446	446	446		BFL16_RS15185.p01	2694088-2694534	-
BFL16_RS15190		head-tail adaptor protein	1	1	1	1	5071	125	11		350	350	350		BFL16_RS15190.p01	2694531-2694881	-
BFL16_RS15195		phage gp6-like head-tail connector protein	1	1	1	1	5070	125	12		326	326	326		BFL16_RS15195.p01	2694891-2695217	-
BFL16_RS15200		phage portal protein	1	1	1	1	5069	125	1		2579	2579	2579		BFL16_RS15200.p01	2695220-2697799	-
BFL16_RS15275		9-O-acetyl-N-acetylneuraminic acid deacetylase	1	1	1	1	5049	8	1		1937	1937	1937		BFL16_RS15275.p01	2706430-2708367	-
BFL16_RS16205		tail assembly protein	1	1	1	1	3148	84	2		677	677	677		BFL16_RS16205.p01	2879356-2880033	-
BFL16_RS16210		tail protein	1	1	1	1	2300	84	1		743	743	743		BFL16_RS16210.p01	2879931-2880674	-
BFL16_RS16230		phage tail assembly protein T	1	1	1	1	2302	92	1		308	308	308		BFL16_RS16230.p01	2884398-2884706	-
BFL16_RS16235		phage minor tail protein G	1	1	1	1	2301	92	2		422	422	422		BFL16_RS16235.p01	2884733-2885155	-
BFL16_RS16245		tail protein	1	1	1	1	3137	22	1		398	398	398		BFL16_RS16245.p01	2885929-2886327	-
BFL16_RS16265		peptidase S14	1	1	1	1	3134	17	1		1955	1955	1955		BFL16_RS16265.p01	2887654-2889609	-
BFL16_RS16280		terminase	1	1	1	1	3130	12	1		2123	2123	2123		BFL16_RS16280.p01	2891334-2893457	-
BFL16_RS17745		hypothetical protein	1	1	1	1	2313	131	1		8381	8381	8381		BFL16_RS17745.p01	3166509-3174890	-
BFL16_RS17750		hypothetical protein	1	1	1	1	2312	131	2		1265	1265	1265		BFL16_RS17750.p01	3174960-3176225	-
BFL16_RS17755		bacteriocin	1	1	1	1	2311	131	31		251	251	251		BFL16_RS17755.p01	3176236-3176487	-
BFL16_RS17760		hypothetical protein	1	1	1	1	2310	131	30		446	446	446		BFL16_RS17760.p01	3176497-3176943	-
BFL16_RS17765		hypothetical protein	1	1	1	1	2309	131	29		656	656	656		BFL16_RS17765.p01	3176946-3177602	-
BFL16_RS17770		hypothetical protein	1	1	1	1	2308	131	28		401	401	401		BFL16_RS17770.p01	3177696-3178097	-
BFL16_RS17775		Hok/Gef family protein	1	1	1	1	2307	131	27		140	140	140		BFL16_RS17775.p01	3178154-3178294	-
BFL16_RS17780		hypothetical protein	1	1	1	1	2306	131	26		245	245	245		BFL16_RS17780.p01	3178351-3178596	-
BFL16_RS17785		outer membrane protein	1	1	1	1	2305	131	25		734	734	734		BFL16_RS17785.p01	3178527-3179261	-
BFL16_RS17790		hypothetical protein	1	1	1	1	5318	131	24		617	617	617		BFL16_RS17790.p01	3179352-3179969	-
BFL16_RS17795		outer membrane protein	1	1	1	1	5319	131	23		278	278	278		BFL16_RS17795.p01	3179975-3180253	-
BFL16_RS17800		host specificity protein J	1	1	1	1	5320	131	22		1268	1268	1268		BFL16_RS17800.p01	3180268-3181536	-
BFL16_RS17805		hypothetical protein	1	1	1	1	5321	131	21		1601	1601	1601		BFL16_RS17805.p01	3181533-3183134	-
BFL16_RS17810		hypothetical protein	1	1	1	1	5322	131	20		242	242	242		BFL16_RS17810.p01	3183452-3183694	-
BFL16_RS17815		phage tail protein	1	1	1	1	5323	131	19		269	269	269		BFL16_RS17815.p01	3183780-3184049	-
BFL16_RS17820		tail fiber protein	1	1	1	1	5324	131	18		1937	1937	1937		BFL16_RS17820.p01	3184051-3185988	-
BFL16_RS17825		hypothetical protein	1	1	1	1	5325	131	17		650	650	650		BFL16_RS17825.p01	3185985-3186635	-
BFL16_RS17830		hypothetical protein	1	1	1	1	5326	131	16		563	563	563		BFL16_RS17830.p01	3186635-3187198	-
BFL16_RS17835		hypothetical protein	1	1	1	1	5327	131	15		461	461	461		BFL16_RS17835.p01	3187182-3187643	-
BFL16_RS17840		hypothetical protein	1	1	1	1	5328	131	14		389	389	389		BFL16_RS17840.p01	3187693-3188082	-
BFL16_RS17845		N4-gp56 family major capsid protein	1	1	1	1	5329	131	13		1214	1214	1214		BFL16_RS17845.p01	3188138-3189352	-
BFL16_RS17850		hypothetical protein	1	1	1	1	5330	131	12		1007	1007	1007		BFL16_RS17850.p01	3189376-3190383	-
BFL16_RS17855		portal protein	1	1	1	1	5331	131	11		2144	2144	2144		BFL16_RS17855.p01	3190541-3192685	-
BFL16_RS17860		terminase	1	1	1	1	5332	131	10		1706	1706	1706		BFL16_RS17860.p01	3192685-3194391	-
BFL16_RS17865		terminase	1	1	1	1	5333	131	9		806	806	806		BFL16_RS17865.p01	3194372-3195178	-
BFL16_RS17870		hypothetical protein	1	1	1	1	5334	131	8		245	245	245		BFL16_RS17870.p01	3195234-3195479	-
BFL16_RS17875		hypothetical protein	1	1	1	1	5335	131	7		293	293	293		BFL16_RS17875.p01	3195587-3195880	-
BFL16_RS17880		lysis protein	1	1	1	1	5336	131	6		464	464	464		BFL16_RS17880.p01	3195912-3196376	-
BFL16_RS17890		hypothetical protein	1	1	1	1	5337	131	5		569	569	569		BFL16_RS17890.p01	3196530-3197099	-
BFL16_RS17895		lysozyme	1	1	1	1	5338	131	4		533	533	533		BFL16_RS17895.p01	3197370-3197903	-
BFL16_RS17900		holin	1	1	1	1	5339	131	3		215	215	215		BFL16_RS17900.p01	3197908-3198123	-
BFL16_RS17910		DUF1378 domain-containing protein	1	1	1	1	5314	134	1		179	179	179		BFL16_RS17910.p01	3198513-3198692	-
BFL16_RS17915		hypothetical protein	1	1	1	1	5313	134	2		1937	1937	1937		BFL16_RS17915.p01	3198827-3200764	-
BFL16_RS17925		Shiga toxin Stx2 subunit B	1	1	1	1	5312	134	3		269	269	269		BFL16_RS17925.p01	3201251-3201520	-
BFL16_RS17935		IS66 family transposase ISEc8	1	1	1	1	5311	134	4		1538	1538	1538		BFL16_RS17935.p01	3201945-3203483	-
BFL16_RS17940		IS66 family insertion sequence hypothetical protein	1	1	1	1	5310	134	5		347	347	347		BFL16_RS17940.p01	3203533-3203880	-
BFL16_RS17945		IS66 family insertion sequence hypothetical protein	1	1	1	1	5309	134	6		380	380	380		BFL16_RS17945.p01	3203877-3204257	-
BFL16_RS17975		hypothetical protein	1	1	1	1	5307	134	8		245	245	245		BFL16_RS17975.p01	3205491-3205736	-
BFL16_RS17980		antitermination protein	1	1	1	1	5306	134	9		434	434	434		BFL16_RS17980.p01	3205725-3206159	-
BFL16_RS17985		protein ninH	1	1	1	1	5305	134	10		194	194	194		BFL16_RS17985.p01	3206152-3206346	-
BFL16_RS17990		recombination protein NinG	1	1	1	1	5304	134	11		605	605	605		BFL16_RS17990.p01	3206343-3206948	-
BFL16_RS17995		DNA-binding protein	1	1	1	1	5303	134	12		722	722	722		BFL16_RS17995.p01	3206948-3207670	-
BFL16_RS18000		phage antirepressor Ant	1	1	1	1	5302	134	13		677	677	677		BFL16_RS18000.p01	3207745-3208422	-
BFL16_RS18005		NinE family protein	1	1	1	1	5301	134	14		182	182	182		BFL16_RS18005.p01	3208697-3208879	-
BFL16_RS18010		phage N-6-adenine-methyltransferase	1	1	1	1	5300	134	15		527	527	527		BFL16_RS18010.p01	3208876-3209403	-
BFL16_RS18015		recombination protein NinB	1	1	1	1	5299	134	16		446	446	446		BFL16_RS18015.p01	3209400-3209846	-
BFL16_RS18020		restriction alleviation protein, Lar family	1	1	1	1	5298	134	17		236	236	236		BFL16_RS18020.p01	3209803-3210039	-
BFL16_RS18025		hypothetical protein	1	1	1	1	5297	134	18		215	215	215		BFL16_RS18025.p01	3210050-3210265	-
BFL16_RS18030		hypothetical protein	1	1	1	1	5296	134	19		269	269	269		BFL16_RS18030.p01	3210351-3210620	-
BFL16_RS18035		replication protein P	1	1	1	1	5295	134	20		2906	2906	2906		BFL16_RS18035.p01	3210621-3213527	-
BFL16_RS18040		replication protein	1	1	1	1	5294	134	21		776	776	776		BFL16_RS18040.p01	3213638-3214414	-
BFL16_RS18045		hypothetical protein	1	1	1	1	5293	134	22		299	299	299		BFL16_RS18045.p01	3214577-3214876	-
BFL16_RS18050		transcriptional regulator	1	1	1	1	5292	134	23		227	227	227		BFL16_RS18050.p01	3215015-3215242	-
BFL16_RS18055		phage repressor protein C	1	1	1	1	5291	134	24		707	707	707		BFL16_RS18055.p01	3215321-3216028	-
BFL16_RS18060		DUF3024 domain-containing protein	1	1	1	1	5290	134	25		341	341	341		BFL16_RS18060.p01	3216089-3216430	-
BFL16_RS18065		hypothetical protein	1	1	1	1	5289	134	26		461	461	461		BFL16_RS18065.p01	3216498-3216959	-
BFL16_RS18070		serine/threonine protein kinase	1	1	1	1	5288	134	27		1046	1046	1046		BFL16_RS18070.p01	3216953-3217999	-
BFL16_RS18075		hypothetical protein	1	1	1	1	5287	134	28		383	383	383		BFL16_RS18075.p01	3218655-3219038	-
BFL16_RS18080		hypothetical protein	1	1	1	1	5286	134	29		443	443	443		BFL16_RS18080.p01	3219097-3219540	-
BFL16_RS18100		host cell division inhibitory peptide Kil	1	1	1	1	5285	134	30		239	239	239		BFL16_RS18100.p01	3221079-3221318	-
BFL16_RS18105		hypothetical protein	1	1	1	1	5284	134	48		188	188	188		BFL16_RS18105.p01	3221315-3221503	-
BFL16_RS18110		ATP-binding protein	1	1	1	1	5283	134	47		680	680	680		BFL16_RS18110.p01	3221512-3222192	-
BFL16_RS18115		hypothetical protein	1	1	1	1	5282	134	46		587	587	587		BFL16_RS18115.p01	3222189-3222776	-
BFL16_RS18120		anti-RecBCD protein 2	1	1	1	1	5281	134	45		296	296	296		BFL16_RS18120.p01	3222800-3223096	-
BFL16_RS18125		hypothetical protein	1	1	1	1	5280	134	44		290	290	290		BFL16_RS18125.p01	3223107-3223397	-
BFL16_RS18130		DUF2737 domain-containing protein	1	1	1	1	2314	134	43		167	167	167		BFL16_RS18130.p01	3223394-3223561	-
BFL16_RS18135		hypothetical protein	1	1	1	1	2315	134	42		644	644	644		BFL16_RS18135.p01	3223558-3224202	-
BFL16_RS18140		hypothetical protein	1	1	1	1	2316	134	41		461	461	461		BFL16_RS18140.p01	3224199-3224660	-
BFL16_RS18145		hypothetical protein	1	1	1	1	2317	134	40		566	566	566		BFL16_RS18145.p01	3224657-3225223	-
BFL16_RS18150		hypothetical protein	1	1	1	1	2318	134	39		185	185	185		BFL16_RS18150.p01	3225198-3225383	-
BFL16_RS18155		DUF551 domain-containing protein	1	1	1	1	2319	134	38		548	548	548		BFL16_RS18155.p01	3225383-3225931	-
BFL16_RS18160		hypothetical protein	1	1	1	1	2320	134	37		200	200	200		BFL16_RS18160.p01	3225918-3226118	-
BFL16_RS18185		hypothetical protein	1	1	1	1	2321	134	36		668	668	668		BFL16_RS18185.p01	3227570-3228238	-
BFL16_RS18190		SAM-binding domain protein	1	1	1	1	2322	134	35		329	329	329		BFL16_RS18190.p01	3228190-3228519	-
BFL16_RS18195		hypothetical protein	1	1	1	1	2323	134	34		212	212	212		BFL16_RS18195.p01	3228479-3228691	-
BFL16_RS18200		hypothetical protein	1	1	1	1	2324	134	33		368	368	368		BFL16_RS18200.p01	3228727-3229095	-
BFL16_RS18205		DNA-binding protein	1	1	1	1	2325	134	32		182	182	182		BFL16_RS18205.p01	3229174-3229356	-
BFL16_RS18210		integrase	1	1	1	1	2326	134	31		1169	1169	1169		BFL16_RS18210.p01	3229340-3230509	-
BFL16_RS18480		IS66 family insertion sequence hypothetical protein	1	1	1	1	2327	99	3		380	380	380		BFL16_RS18480.p01	3284215-3284595	-
BFL16_RS18485		IS66 family insertion sequence hypothetical protein	1	1	1	1	2328	99	2		347	347	347		BFL16_RS18485.p01	3284592-3284939	-
BFL16_RS18490		IS66 family transposase ISEc8	1	1	1	1	2329	99	1		1538	1538	1538		BFL16_RS18490.p01	3284989-3286527	-
BFL16_RS19830		hypothetical protein	1	1	1	1	2331	33	1		257	257	257		BFL16_RS19830.p01	3539294-3539551	-
BFL16_RS21695		A/G-specific adenine glycosylase	1	1	1	1	837	24	1		1052	1052	1052		BFL16_RS21695.p01	3883442-3884494	-
BFL16_RS21840		cytotoxin	1	1	1	1	855	93	2		1301	1301	1301		BFL16_RS21840.p01	3906036-3907337	-
BFL16_RS21845		cytotoxin	1	1	1	1	856	93	1		827	827	827		BFL16_RS21845.p01	3907343-3908170	-
BFL16_RS22610		transcriptional regulator	1	1	1	1	728	66	1		938	938	938		BFL16_RS22610.p01	4044592-4045530	-
BFL16_RS25620		integrase	1	1	1	1	1396	127	3		1169	1169	1169		BFL16_RS25620.p01	4619694-4620863	-
BFL16_RS25625		hypothetical protein	1	1	1	1	1397	127	4		1859	1859	1859		BFL16_RS25625.p01	4620883-4622742	-
BFL16_RS25630		hypothetical protein	1	1	1	1	1398	127	5		425	425	425		BFL16_RS25630.p01	4622739-4623164	-
BFL16_RS25635		Polarity suppression protein	1	1	1	1	1399	127	6		572	572	572		BFL16_RS25635.p01	4623492-4624064	-
BFL16_RS25640		transactivation protein	1	1	1	1	1400	127	7		500	500	500		BFL16_RS25640.p01	4624138-4624638	-
BFL16_RS25645		hypothetical protein	1	1	1	1	1401	127	8		734	734	734		BFL16_RS25645.p01	4624635-4625369	-
BFL16_RS25655		ABC transporter permease	1	1	1	1	1402	127	9		218	218	218		BFL16_RS25655.p01	4625748-4625966	-
BFL16_RS25660		AlpA family phage regulatory protein	1	1	1	1	1403	127	10		266	266	266		BFL16_RS25660.p01	4625921-4626187	-
BFL16_RS25665		hypothetical protein	1	1	1	1	1404	127	11		590	590	590		BFL16_RS25665.p01	4626184-4626774	-
BFL16_RS25670		hypothetical protein	1	1	1	1	1405	127	12		287	287	287		BFL16_RS25670.p01	4626767-4627054	-
BFL16_RS25675		hypothetical protein	1	1	1	1	1406	127	13		455	455	455		BFL16_RS25675.p01	4627047-4627502	-
BFL16_RS25680		hypothetical protein	1	1	1	1	1407	127	14		320	320	320		BFL16_RS25680.p01	4627638-4627958	-
BFL16_RS25685		DNA primase	1	1	1	1	1408	127	2		2333	2333	2333		BFL16_RS25685.p01	4627973-4630306	-
BFL16_RS25690		hypothetical protein	1	1	1	1	1409	127	1		146	146	146		BFL16_RS25690.p01	4630521-4630667	-
BFL16_RS28300		phage tail protein	1	1	1	1	594	4	1		1313	1313	1313		BFL16_RS28300.p01	5126435-5127748	-
BFL16_RS29340		hypothetical protein	1	1	1	1	2031	90	1		179	179	179		BFL16_RS29340.p01	5314665-5314844	-
BFL16_RS29345		translocation and assembly module TamA	1	1	1	1	2030	90	2		1733	1733	1733		BFL16_RS29345.p01	5314814-5316547	-
BFL16_RS29575		integrase	1	1	1	1	1988	122	7		1949	1949	1949		BFL16_RS29575.p01	5364090-5366039	-
BFL16_RS29580		DUF4160 domain-containing protein	1	1	1	1	1987	122	8		284	284	284		BFL16_RS29580.p01	5366322-5366606	-
BFL16_RS29585		NIPSNAP family protein	1	1	1	1	1865	122	6		332	332	332		BFL16_RS29585.p01	5366821-5367153	-
BFL16_RS29590		hypothetical protein	1	1	1	1	1866	122	5		176	176	176		BFL16_RS29590.p01	5367717-5367893	-
BFL16_RS29595		DUF1643 domain-containing protein	1	1	1	1	1867	122	4		467	467	467		BFL16_RS29595.p01	5368157-5368624	-
BFL16_RS29600		resolvase	1	1	1	1	1868	122	3		575	575	575		BFL16_RS29600.p01	5368811-5369386	-
BFL16_RS29610		hypothetical protein	1	1	1	1	1869	122	2		773	773	773		BFL16_RS29610.p01	5371053-5371826	-
BFL16_RS29615		XRE family transcriptional regulator	1	1	1	1	1870	122	1		464	464	464		BFL16_RS29615.p01	5371943-5372407	-
BFL16_RS29750		chaperone protein FimC	1	1	1	1	1965	109	1		725	725	725		BFL16_RS29750.p01	5414797-5415522	-
BFL16_RS29755		IS66 family transposase ISEc8	1	1	1	1	1871	109	2		1538	1538	1538		BFL16_RS29755.p01	5415730-5417268	-
BFL16_RS29760		IS66 family insertion sequence hypothetical protein	1	1	1	1	1872	109	4		347	347	347		BFL16_RS29760.p01	5417318-5417665	-
BFL16_RS29765		IS66 family insertion sequence hypothetical protein	1	1	1	1	1873	109	3		380	380	380		BFL16_RS29765.p01	5417662-5418042	-
BFL16_RS31055		GNAT family N-acetyltransferase	1	1	1	1	4654	95	1		239	239	239		BFL16_RS31055.p01	1900809-1901048	-
BFL16_RS31070		hypothetical protein	1	1	1	1	20	132	38		320	320	320		BFL16_RS31070.p01	2112443-2112763	-
BFL16_RS31090		hypothetical protein	1	1	1	1	34	128	2		515	515	515		BFL16_RS31090.p01	2155146-2155661	-
BFL16_RS31170		hypothetical protein	1	1	1	1	5567	41	1		263	263	263		BFL16_RS31170.p01	2672387-2672650	-
BFL16_RS31245		hypothetical protein	1	1	1	1	5308	134	7		152	152	152		BFL16_RS31245.p01	3205324-3205476	-

## Sheet: Genes unique in strain 10671
Gene	Non-unique Gene name	Annotation	No. isolates	No. sequences	Avg sequences per isolate	Genome Fragment	Order within Fragment	Accessory Fragment	Accessory Order with Fragment	QC	Min group size nuc	Max group size nuc	Avg group size nuc	10671_pub.gbf	9000_pub.gbf	9000 Coordinates	10671 Coordinates
BFL17_RS30320		hypothetical protein	1	1	1	1	584	129	18		392	392	392	BFL17_RS30320.p01		-	2415572-2415964
BFL17_RS13175		hypothetical protein	1	1	1	1	585	129	19		188	188	188	BFL17_RS13175.p01		-	2416025-2416213
BFL17_RS13180		hypothetical protein	1	1	1	1	586	129	20		827	827	827	BFL17_RS13180.p01		-	2416210-2417037
BFL17_RS13185		hypothetical protein	1	1	1	1	587	129	21		749	749	749	BFL17_RS13185.p01		-	2417081-2417830
BFL17_RS13190		hypothetical protein	1	1	1	1	588	129	22		569	569	569	BFL17_RS13190.p01		-	2417827-2418396
BFL17_RS13195		DUF4222 domain-containing protein	1	1	1	1	589	129	23		242	242	242	BFL17_RS13195.p01		-	2418520-2418762
BFL17_RS13200		hypothetical protein	1	1	1	1	590	129	24		146	146	146	BFL17_RS13200.p01		-	2418766-2418912
BFL17_RS13205		excisionase	1	1	1	1	591	129	3		236	236	236	BFL17_RS13205.p01		-	2418921-2419157
BFL17_RS13210		phage integrase	1	1	1	1	592	129	2		1313	1313	1313	BFL17_RS13210.p01		-	2419213-2420526
BFL17_RS13230		DUF72 domain-containing protein	1	1	1	1	593	129	1		809	809	809	BFL17_RS13230.p01		-	2421782-2422591
BFL17_RS09400		tail assembly protein	1	1	1	1	5121	106	3		680	680	680	BFL17_RS09400.p01		-	1717746-1718426
BFL17_RS14005		phage tail protein	1	1	1	1	5085	77	2		743	743	743	BFL17_RS14005.p01		-	2545683-2546426
BFL17_RS30345		tail length tape measure protein	1	1	1	1	2272	16	1		1202	1202	1202	BFL17_RS30345.p01		-	2548830-2550032
BFL17_RS14340		inverse autotransporter adhesin-like protein YeeJ	1	1	1	1	2225	73	1		8057	8057	8057	BFL17_RS14340.p01		-	2581806-2589863
BFL17_RS14595		host specificity protein J	1	1	1	1	52	63	1		3494	3494	3494	BFL17_RS14595.p01		-	2627647-2631141
BFL17_RS14610		phage antirepressor Ant	1	1	1	1	2	111	2		923	923	923	BFL17_RS14610.p01		-	2632770-2633693
BFL17_RS14615		Arc family DNA-binding protein	1	1	1	1	3	111	4		173	173	173	BFL17_RS14615.p01		-	2633764-2633937
BFL17_RS14620		Arc family DNA-binding protein	1	1	1	1	5583	111	3		320	320	320	BFL17_RS14620.p01		-	2634045-2634365
BFL17_RS14635		phage tail tape measure protein	1	1	1	1	50	29	1		3242	3242	3242	BFL17_RS14635.p01		-	2635414-2638656
BFL17_RS14700		hypothetical protein	1	1	1	1	5060	42	1		209	209	209	BFL17_RS14700.p01		-	2648770-2648979
BFL17_RS14995		phage integrase	1	1	1	1	2277	67	1		1178	1178	1178	BFL17_RS14995.p01		-	2679325-2680503
BFL17_RS14000		tail assembly protein	1	1	1	1	5084	77	1		677	677	677	BFL17_RS14000.p01		-	2545108-2545785
BFL17_RS15395		transcriptional regulator	1	1	1	1	2294	133	1		218	218	218	BFL17_RS15395.p01		-	2768155-2768373
BFL17_RS15400		phage late control D family protein	1	1	1	1	2293	133	2		1163	1163	1163	BFL17_RS15400.p01		-	2768455-2769618
BFL17_RS15405		tail assembly protein	1	1	1	1	2292	133	3		479	479	479	BFL17_RS15405.p01		-	2769618-2770097
BFL17_RS15410		phage tail tape measure protein	1	1	1	1	2291	133	4		2447	2447	2447	BFL17_RS15410.p01		-	2770112-2772559
BFL17_RS15420		phage tail assembly protein	1	1	1	1	2290	133	5		275	275	275	BFL17_RS15420.p01		-	2772704-2772979
BFL17_RS15425		major tail tube protein	1	1	1	1	2289	133	6		518	518	518	BFL17_RS15425.p01		-	2773036-2773554
BFL17_RS15430		major tail sheath protein	1	1	1	1	2288	133	7		1190	1190	1190	BFL17_RS15430.p01		-	2773567-2774757
BFL17_RS15435		resolvase	1	1	1	1	2287	133	8		593	593	593	BFL17_RS15435.p01		-	2774817-2775410
BFL17_RS15445		tail assembly chaperone	1	1	1	1	2285	133	10		443	443	443	BFL17_RS15445.p01		-	2775872-2776315
BFL17_RS15450		tail fiber assembly protein	1	1	1	1	2284	133	11		602	602	602	BFL17_RS15450.p01		-	2776287-2776889
BFL17_RS15455		phage Tail Collar domain protein	1	1	1	1	2283	133	12		1319	1319	1319	BFL17_RS15455.p01		-	2776889-2778208
BFL17_RS15460		phage tail protein I	1	1	1	1	2282	133	13		611	611	611	BFL17_RS15460.p01		-	2778205-2778816
BFL17_RS15465		baseplate assembly protein	1	1	1	1	2281	133	14		908	908	908	BFL17_RS15465.p01		-	2778809-2779717
BFL17_RS15470		baseplate assembly protein	1	1	1	1	2280	133	15		347	347	347	BFL17_RS15470.p01		-	2779722-2780069
BFL17_RS15475		phage baseplate assembly protein V	1	1	1	1	2279	133	16		635	635	635	BFL17_RS15475.p01		-	2780066-2780701
BFL17_RS15480		phage virion morphogenesis protein	1	1	1	1	2278	133	17		452	452	452	BFL17_RS15480.p01		-	2780768-2781220
BFL17_RS15485		tail fiber protein	1	1	1	1	4911	133	18		467	467	467	BFL17_RS15485.p01		-	2781213-2781680
BFL17_RS15490		phage lysis protein	1	1	1	1	4912	133	19		173	173	173	BFL17_RS15490.p01		-	2781643-2781816
BFL17_RS15495		phage lysis regulatory, LysB family protein	1	1	1	1	4913	133	20		425	425	425	BFL17_RS15495.p01		-	2781788-2782213
BFL17_RS15500		hypothetical protein	1	1	1	1	4914	133	21		425	425	425	BFL17_RS15500.p01		-	2782201-2782626
BFL17_RS15505		lysozyme	1	1	1	1	4915	133	22		497	497	497	BFL17_RS15505.p01		-	2782641-2783138
BFL17_RS15510		holin	1	1	1	1	4916	133	23		281	281	281	BFL17_RS15510.p01		-	2783138-2783419
BFL17_RS15515		tail protein X	1	1	1	1	4917	133	24		203	203	203	BFL17_RS15515.p01		-	2783423-2783626
BFL17_RS15520		head completion/stabilization protein	1	1	1	1	4918	133	25		509	509	509	BFL17_RS15520.p01		-	2783626-2784135
BFL17_RS15525		terminase	1	1	1	1	4919	133	42		743	743	743	BFL17_RS15525.p01		-	2784235-2784978
BFL17_RS15530		phage capsid protein	1	1	1	1	4920	133	41		1073	1073	1073	BFL17_RS15530.p01		-	2784982-2786055
BFL17_RS15535		phage capsid scaffolding protein	1	1	1	1	4921	133	40		854	854	854	BFL17_RS15535.p01		-	2786114-2786968
BFL17_RS15540		oxidoreductase	1	1	1	1	4922	133	39		1772	1772	1772	BFL17_RS15540.p01		-	2787142-2788914
BFL17_RS15545		phage portal protein	1	1	1	1	4923	133	38		1034	1034	1034	BFL17_RS15545.p01		-	2788914-2789948
BFL17_RS15550		toxin	1	1	1	1	4924	133	37		776	776	776	BFL17_RS15550.p01		-	2790727-2791503
BFL17_RS15555		cytolethal distending toxin subunit B family protein	1	1	1	1	4925	133	36		809	809	809	BFL17_RS15555.p01		-	2791500-2792309
BFL17_RS15560		cytolethal distending toxin subunit C	1	1	1	1	4926	133	35		545	545	545	BFL17_RS15560.p01		-	2792324-2792869
BFL17_RS15565		replication endonuclease	1	1	1	1	4927	133	34		2297	2297	2297	BFL17_RS15565.p01		-	2792945-2795242
BFL17_RS15570		hypothetical protein	1	1	1	1	4928	133	33		275	275	275	BFL17_RS15570.p01		-	2795232-2795507
BFL17_RS15575		hypothetical protein	1	1	1	1	4929	133	32		224	224	224	BFL17_RS15575.p01		-	2795504-2795728
BFL17_RS15580		hypothetical protein	1	1	1	1	4930	133	31		299	299	299	BFL17_RS15580.p01		-	2795731-2796030
BFL17_RS15585		DUF2732 domain-containing protein	1	1	1	1	4931	133	30		224	224	224	BFL17_RS15585.p01		-	2796030-2796254
BFL17_RS15590		hypothetical protein	1	1	1	1	4932	133	29		500	500	500	BFL17_RS15590.p01		-	2796318-2796818
BFL17_RS15595		hypothetical protein	1	1	1	1	4933	133	28		275	275	275	BFL17_RS15595.p01		-	2796996-2797271
BFL17_RS15600		XRE family transcriptional regulator	1	1	1	1	4934	133	27		299	299	299	BFL17_RS15600.p01		-	2797386-2797685
BFL17_RS15605		integrase	1	1	1	1	4935	133	26		1013	1013	1013	BFL17_RS15605.p01		-	2797801-2798814
BFL17_RS15705		hypothetical protein	1	1	1	1	2298	126	1		266	266	266	BFL17_RS15705.p01		-	2815150-2815416
BFL17_RS15710		hypothetical protein	1	1	1	1	2297	126	2		275	275	275	BFL17_RS15710.p01		-	2815745-2816020
BFL17_RS15715		hypothetical protein	1	1	1	1	2296	126	3		281	281	281	BFL17_RS15715.p01		-	2816138-2816419
BFL17_RS15720		terminase large subunit	1	1	1	1	2295	126	4		1661	1661	1661	BFL17_RS15720.p01		-	2816434-2818095
BFL17_RS15725		phage terminase small subunit P27 family	1	1	1	1	4870	126	5		356	356	356	BFL17_RS15725.p01		-	2818079-2818435
BFL17_RS15730		hypothetical protein	1	1	1	1	4871	126	6		173	173	173	BFL17_RS15730.p01		-	2818558-2818731
BFL17_RS15735		HNH endonuclease	1	1	1	1	4872	126	7		440	440	440	BFL17_RS15735.p01		-	2818724-2819164
BFL17_RS15740		hypothetical protein	1	1	1	1	4873	126	8		296	296	296	BFL17_RS15740.p01		-	2819164-2819460
BFL17_RS15745		head-tail adaptor	1	1	1	1	4874	126	9		338	338	338	BFL17_RS15745.p01		-	2819457-2819795
BFL17_RS15750		phage portal protein	1	1	1	1	4875	126	10		1211	1211	1211	BFL17_RS15750.p01		-	2819792-2821003
BFL17_RS15755		HK97 family phage prohead protease	1	1	1	1	4876	126	13		557	557	557	BFL17_RS15755.p01		-	2821005-2821562
BFL17_RS15760		phage major capsid protein	1	1	1	1	4877	126	12		1157	1157	1157	BFL17_RS15760.p01		-	2821617-2822774
BFL17_RS15765		PerC family transcriptional regulator	1	1	1	1	4878	126	11		272	272	272	BFL17_RS15765.p01		-	2823062-2823334
BFL17_RS15775		hypothetical protein	1	1	1	1	4880	114	1		188	188	188	BFL17_RS15775.p01		-	2823767-2823955
BFL17_RS15780		hypothetical protein	1	1	1	1	4881	114	2		251	251	251	BFL17_RS15780.p01		-	2824069-2824320
BFL17_RS15785		hypothetical protein	1	1	1	1	4882	114	4		344	344	344	BFL17_RS15785.p01		-	2824352-2824696
BFL17_RS15790		DUF927 domain-containing protein	1	1	1	1	4883	114	3		2132	2132	2132	BFL17_RS15790.p01		-	2824693-2826825
BFL17_RS15800		hypothetical protein	1	1	1	1	4885	37	1		242	242	242	BFL17_RS15800.p01		-	2827127-2827369
BFL17_RS15810		hypothetical protein	1	1	1	1	4634	110	2		185	185	185	BFL17_RS15810.p01		-	2827550-2827735
BFL17_RS13010		peptidase S14	1	1	1	1	5374	105	1		1955	1955	1955	BFL17_RS13010.p01		-	2394013-2395968
BFL17_RS16100		peptidase S14	1	1	1	1	3132	58	1		1955	1955	1955	BFL17_RS16100.p01		-	2882160-2884115
BFL17_RS30390		hypothetical protein	1	1	1	1	4633	110	3		410	410	410	BFL17_RS30390.p01		-	2827728-2828138
BFL17_RS15820		hypothetical protein	1	1	1	1	4632	110	4		305	305	305	BFL17_RS15820.p01		-	2828137-2828442
BFL17_RS15825		hypothetical protein	1	1	1	1	4631	110	1		188	188	188	BFL17_RS15825.p01		-	2828485-2828673
BFL17_RS15840		phage integrase	1	1	1	1	4891	91	2		1220	1220	1220	BFL17_RS15840.p01		-	2829871-2831091
BFL17_RS15845		hypothetical protein	1	1	1	1	4892	91	1		182	182	182	BFL17_RS15845.p01		-	2831093-2831275
BFL17_RS15890		fimbrial biogenesis outer membrane usher protein	1	1	1	1	2299	39	1		2480	2480	2480	BFL17_RS15890.p01		-	2836524-2839004
BFL17_RS18255		hydrogenase 4 subunit B	1	1	1	1	2746	25	1		2018	2018	2018	BFL17_RS18255.p01		-	3287613-3289631
BFL17_RS19205		hypothetical protein	1	1	1	1	2575	26	1		1349	1349	1349	BFL17_RS19205.p01		-	3474252-3475601
BFL17_RS19335		hypothetical protein	1	1	1	1	2332	50	1		248	248	248	BFL17_RS19335.p01		-	3497135-3497383
BFL17_RS20555		oxidoreductase (Fe-S)-binding subunit	1	1	1	1	2333	3	1		1919	1919	1919	BFL17_RS20555.p01		-	3735777-3737696
BFL17_RS22035		inorganic phosphate transporter	1	1	1	1	595	49	1		1316	1316	1316	BFL17_RS22035.p01		-	3995628-3996944
BFL17_RS24935		integrase	1	1	1	1	5536	94	2		1181	1181	1181	BFL17_RS24935.p01		-	4549546-4550727
BFL17_RS24955		structural protein	1	1	1	1	5537	94	1		143	143	143	BFL17_RS24955.p01		-	4552060-4552203
BFL17_RS24965		hypothetical protein	1	1	1	1	1410	80	2		488	488	488	BFL17_RS24965.p01		-	4552667-4553155
BFL17_RS24970		DUF957 domain-containing protein	1	1	1	1	1411	80	1		197	197	197	BFL17_RS24970.p01		-	4553167-4553364
BFL17_RS26355		acyltransferase	1	1	1	1	1658	5	1		932	932	932	BFL17_RS26355.p01		-	4810111-4811043
BFL17_RS28865		integrase	1	1	1	1	1986	9	1		827	827	827	BFL17_RS28865.p01		-	5287832-5288659
BFL17_RS06780		phage tail protein	1	1	1	1	4335	60	1		152	152	152	BFL17_RS06780.p01		-	1284486-1284638
BFL17_RS19065		transposase	1	1	1	1	2330	43	1		566	566	566	BFL17_RS19065.p01		-	3450225-3450791
BFL17_RS17050		MFS transporter	1	1	1	1	2304	40	1		557	557	557	BFL17_RS17050.p01		-	3059311-3059868
BFL17_RS12990		phage tail protein	1	1	1	1	5379	68	1		398	398	398	BFL17_RS12990.p01		-	2392288-2392686
BFL17_RS16080		phage tail protein	1	1	1	1	3139	55	1		398	398	398	BFL17_RS16080.p01		-	2880435-2880833
BFL17_RS12980		phage minor tail protein G	1	1	1	1	5273	78	2		422	422	422	BFL17_RS12980.p01		-	2391092-2391514
BFL17_RS16070		phage minor tail protein G	1	1	1	1	3141	87	1		422	422	422	BFL17_RS16070.p01		-	2879239-2879661
BFL17_RS12975		phage tail assembly protein T	1	1	1	1	5272	78	1		308	308	308	BFL17_RS12975.p01		-	2390757-2391065
BFL17_RS16065		phage tail assembly protein T	1	1	1	1	3142	87	2		308	308	308	BFL17_RS16065.p01		-	2878904-2879212
BFL17_RS13025		terminase	1	1	1	1	5278	98	3		2123	2123	2123	BFL17_RS13025.p01		-	2397693-2399816
BFL17_RS16115		terminase	1	1	1	1	2303	21	1		2123	2123	2123	BFL17_RS16115.p01		-	2885840-2887963
BFL17_RS08005		phage tail tape measure protein	1	1	1	1	4842	112	3		3242	3242	3242	BFL17_RS08005.p01		-	1498676-1501918
BFL17_RS11010		phage tail tape measure protein	1	1	1	1	4652	61	1		3242	3242	3242	BFL17_RS11010.p01		-	2040740-2043982
BFL17_RS12950		tail assembly protein	1	1	1	1	5385	121	5		680	680	680	BFL17_RS12950.p01		-	2385712-2386392
BFL17_RS16040		tail assembly protein	1	1	1	1	3147	83	2		680	680	680	BFL17_RS16040.p01		-	2873859-2874539
BFL17_RS09410		Ail/Lom family protein	1	1	1	1	5124	32	1		599	599	599	BFL17_RS09410.p01		-	1722220-1722819
BFL17_RS12940		Ail/Lom family protein	1	1	1	1	5529	121	3		599	599	599	BFL17_RS12940.p01		-	2381411-2382010
BFL17_RS13030		DUF1441 domain-containing protein	1	1	1	1	5279	98	1		476	476	476	BFL17_RS13030.p01		-	2399813-2400289
BFL17_RS14035		tail fiber protein	1	1	1	1	2269	104	2		740	740	740	BFL17_RS14035.p01		-	2550898-2551638
BFL17_RS14915		IS66 family insertion sequence hypothetical protein	1	1	1	1	2276	97	3		380	380	380	BFL17_RS14915.p01		-	2672263-2672643
BFL17_RS06670		terminase	1	1	1	1	4353	27	1		1928	1928	1928	BFL17_RS06670.p01		-	1264254-1266182
BFL17_RS11035		hypothetical protein	1	1	1	1	4649	108	1		446	446	446	BFL17_RS11035.p01		-	2045836-2046282
BFL17_RS14660		hypothetical protein	1	1	1	1	5065	116	2		446	446	446	BFL17_RS14660.p01		-	2640510-2640956
BFL17_RS11025		tail protein	1	1	1	1	4651	108	3		716	716	716	BFL17_RS11025.p01		-	2044720-2045436
BFL17_RS11030		DUF3168 domain-containing protein	1	1	1	1	4650	108	2		344	344	344	BFL17_RS11030.p01		-	2045495-2045839
BFL17_RS14655		DUF3168 domain-containing protein	1	1	1	1	5064	116	1		344	344	344	BFL17_RS14655.p01		-	2640169-2640513
BFL17_RS07995		tail assembly protein	1	1	1	1	4840	112	1		374	374	374	BFL17_RS07995.p01		-	1497944-1498318
BFL17_RS14910		IS66 family insertion sequence hypothetical protein	1	1	1	1	2275	97	2		347	347	347	BFL17_RS14910.p01		-	2671919-2672266
BFL17_RS11055		hypothetical protein	1	1	1	1	4834	11	1		221	221	221	BFL17_RS11055.p01		-	2049492-2049713
BFL17_RS14605		tail protein	1	1	1	1	1	111	1		737	737	737	BFL17_RS14605.p01		-	2631979-2632716
BFL17_RS09390		phage minor tail protein L	1	1	1	1	5119	106	1		698	698	698	BFL17_RS09390.p01		-	1716396-1717094
BFL17_RS12960		phage minor tail protein L	1	1	1	1	5387	121	6		698	698	698	BFL17_RS12960.p01		-	2387044-2387742
BFL17_RS14905		IS66 family transposase ISEc8	1	1	1	1	2274	97	1		1538	1538	1538	BFL17_RS14905.p01		-	2670331-2671869
BFL17_RS07975		head-tail adaptor protein	1	1	1	1	4823	88	1		350	350	350	BFL17_RS07975.p01		-	1496029-1496379
BFL17_RS14665		head-tail adaptor protein	1	1	1	1	5066	116	3		350	350	350	BFL17_RS14665.p01		-	2640953-2641303
BFL17_RS08000		phage tail protein	1	1	1	1	4841	112	2		281	281	281	BFL17_RS08000.p01		-	1498342-1498623
BFL17_RS13020		hypothetical protein	1	1	1	1	5277	98	2		236	236	236	BFL17_RS13020.p01		-	2397484-2397720
BFL17_RS06720		tail protein	1	1	1	1	4344	57	1		329	329	329	BFL17_RS06720.p01		-	1274326-1274655
BFL17_RS07970		phage gp6-like head-tail connector protein	1	1	1	1	4822	88	2		326	326	326	BFL17_RS07970.p01		-	1495693-1496019
BFL17_RS14670		phage gp6-like head-tail connector protein	1	1	1	1	5067	116	4		326	326	326	BFL17_RS14670.p01		-	2641313-2641639
BFL17_RS13000		DNA breaking-rejoining protein	1	1	1	1	5376	105	2		281	281	281	BFL17_RS13000.p01		-	2393325-2393606
BFL17_RS14040		minor capsid protein E	1	1	1	1	2268	104	1		266	266	266	BFL17_RS14040.p01		-	2551620-2551886
BFL17_RS13005		DUF2190 domain-containing protein	1	1	1	1	5375	105	3		326	326	326	BFL17_RS13005.p01		-	2393599-2393925
BFL17_RS12930		phage tail protein	1	1	1	1	5531	121	1		269	269	269	BFL17_RS12930.p01		-	2379762-2380031
BFL17_RS08010		tail protein	1	1	1	1	4843	112	4		341	341	341	BFL17_RS08010.p01		-	1501911-1502252
BFL17_RS14030		phage minor tail protein G	1	1	1	1	2270	104	3		431	431	431	BFL17_RS14030.p01		-	2550453-2550884
BFL17_RS12935		phage tail protein	1	1	1	1	5530	121	2		1313	1313	1313	BFL17_RS12935.p01		-	2380033-2381346
BFL17_RS13985		phage tail protein	1	1	1	1	5092	28	1		1313	1313	1313	BFL17_RS13985.p01		-	2539343-2540656
BFL17_RS01520		hypothetical protein	1	1	1	1	3183	6	1		386	386	386	BFL17_RS01520.p01		-	303966-304352
BFL17_RS01700		MFS transporter	1	1	1	1	3181	51	1		1193	1193	1193	BFL17_RS01700.p01		-	331348-332541
BFL17_RS02970		Ig-like domain repeat protein	1	1	1	1	3729	13	1		15566	15566	15566	BFL17_RS02970.p01		-	589795-605361
BFL17_RS05680		hypothetical protein	1	1	1	1	4293	71	1		1079	1079	1079	BFL17_RS05680.p01		-	1099507-1100586
BFL17_RS08360		hypothetical protein	1	1	1	1	124	7	1		293	293	293	BFL17_RS08360.p01		-	1550148-1550441
BFL17_RS09125		exonuclease	1	1	1	1	87	20	1		2471	2471	2471	BFL17_RS09125.p01		-	1681236-1683707
BFL17_RS09365		tail fiber protein	1	1	1	1	5111	74	1		752	752	752	BFL17_RS09365.p01		-	1711849-1712601
BFL17_RS09395		phage tail protein	1	1	1	1	5120	106	2		743	743	743	BFL17_RS09395.p01		-	1717105-1717848
BFL17_RS09670		fimbrial protein	1	1	1	1	5153	119	5		563	563	563	BFL17_RS09670.p01		-	1770783-1771346
BFL17_RS09675		fimbrial chaperone protein FimC	1	1	1	1	5152	119	6		719	719	719	BFL17_RS09675.p01		-	1771698-1772417
BFL17_RS09680		fimbrial biogenesis outer membrane usher protein	1	1	1	1	5151	119	4		2651	2651	2651	BFL17_RS09680.p01		-	1772459-1775110
BFL17_RS09685		type 1 fimbrial protein	1	1	1	1	5154	119	3		530	530	530	BFL17_RS09685.p01		-	1775124-1775654
BFL17_RS09690		type 1 fimbrial protein	1	1	1	1	5155	119	2		503	503	503	BFL17_RS09690.p01		-	1775667-1776170
BFL17_RS09695		fimbrial protein	1	1	1	1	5156	119	1		914	914	914	BFL17_RS09695.p01		-	1776230-1777144
puuD		gamma-glutamyl-gamma-aminobutyrate hydrolase	1	1	1	1	4745	45	1		764	764	764	BFL17_RS10585.p01		-	1962920-1963684
BFL17_RS12920		DUF4765 domain-containing protein	1	1	1	1	5528	72	1		3386	3386	3386	BFL17_RS12920.p01		-	2375514-2378900
BFL17_RS15440		phage tail protein	1	1	1	1	2286	133	9		410	410	410	BFL17_RS15440.p01		-	2775441-2775851
BFL17_RS12945		host specificity protein J	1	1	1	1	5384	121	4		3389	3389	3389	BFL17_RS12945.p01		-	2382077-2385466
BFL17_RS13050		lysis protein	1	1	1	1	5367	113	1		467	467	467	BFL17_RS13050.p01		-	2400997-2401464
BFL17_RS13055		lysozyme	1	1	1	1	5315	113	2		533	533	533	BFL17_RS13055.p01		-	2401461-2401994
BFL17_RS13060		hypothetical protein	1	1	1	1	5316	113	3		557	557	557	BFL17_RS13060.p01		-	2402037-2402594
BFL17_RS13065		holin	1	1	1	1	5317	113	4		215	215	215	BFL17_RS13065.p01		-	2402598-2402813
BFL17_RS13075		DUF1378 domain-containing protein	1	1	1	1	5341	36	1		179	179	179	BFL17_RS13075.p01		-	2403203-2403382
BFL17_RS13100		hypothetical protein	1	1	1	1	5355	129	4		944	944	944	BFL17_RS13100.p01		-	2406368-2407312
BFL17_RS13105		antitermination protein	1	1	1	1	5354	129	5		815	815	815	BFL17_RS13105.p01		-	2407449-2408264
BFL17_RS12955		phage tail protein	1	1	1	1	5386	121	7		743	743	743	BFL17_RS12955.p01		-	2386290-2387033
BFL17_RS16045		phage tail protein	1	1	1	1	3146	83	1		743	743	743	BFL17_RS16045.p01		-	2874437-2875180
BFL17_RS13110		hypothetical protein	1	1	1	1	5353	129	6		857	857	857	BFL17_RS13110.p01		-	2408264-2409121
BFL17_RS13115		DNA primase	1	1	1	1	5352	129	7		968	968	968	BFL17_RS13115.p01		-	2409121-2410089
BFL17_RS13120		helicase	1	1	1	1	5351	129	8		1658	1658	1658	BFL17_RS13120.p01		-	2410091-2411749
BFL17_RS13125		hypothetical protein	1	1	1	1	5350	129	9		362	362	362	BFL17_RS13125.p01		-	2411861-2412223
BFL17_RS13130		hypothetical protein	1	1	1	1	5349	129	10		293	293	293	BFL17_RS13130.p01		-	2412472-2412765
BFL17_RS30315		hypothetical protein	1	1	1	1	5348	129	11		242	242	242	BFL17_RS30315.p01		-	2412927-2413169
BFL17_RS13140		transcriptional regulator	1	1	1	1	5347	129	12		455	455	455	BFL17_RS13140.p01		-	2413235-2413690
BFL17_RS13145		transcriptional regulator	1	1	1	1	5346	129	13		443	443	443	BFL17_RS13145.p01		-	2413803-2414246
BFL17_RS13150		hypothetical protein	1	1	1	1	5345	129	14		191	191	191	BFL17_RS13150.p01		-	2414248-2414439
BFL17_RS13155		hypothetical protein	1	1	1	1	5344	129	15		191	191	191	BFL17_RS13155.p01		-	2414436-2414627
BFL17_RS13165		hypothetical protein	1	1	1	1	5343	129	16		215	215	215	BFL17_RS13165.p01		-	2415170-2415385
BFL17_RS13170		hypothetical protein	1	1	1	1	5342	129	17		218	218	218	BFL17_RS13170.p01		-	2415357-2415575
