# Supplementary material for: Shiga toxin sub-type 2a increases the efficiency of Escherichia coli O157 transmission between animals and restricts epithelial regeneration in bovine enteroids
Source: PLOS journal article supplement (doi:10.1371/journal.ppat.1008003), 2019-10-03

**S5 Fig. Weekly serum antibody responses to strains 9000, 9000R and 10671.** Serum levels of (A) H7-specific; (B) Tir-specific; (C) EspA-specific and (D) Intimin-specific serum antibody levels in *E. coli* O157 challenged and unchallenged control calves. Levels of antigen-specific IgA, IgG1 and IgG2 in weekly serum samples collected from calves orally challenged with  $\sim 10^9$  CFU of *E. coli* O157 strains 9000, 9000R or 10671, or from unchallenged control calves were determined by indirect ELISA. Data represents the mean value  $\pm$  SEM.

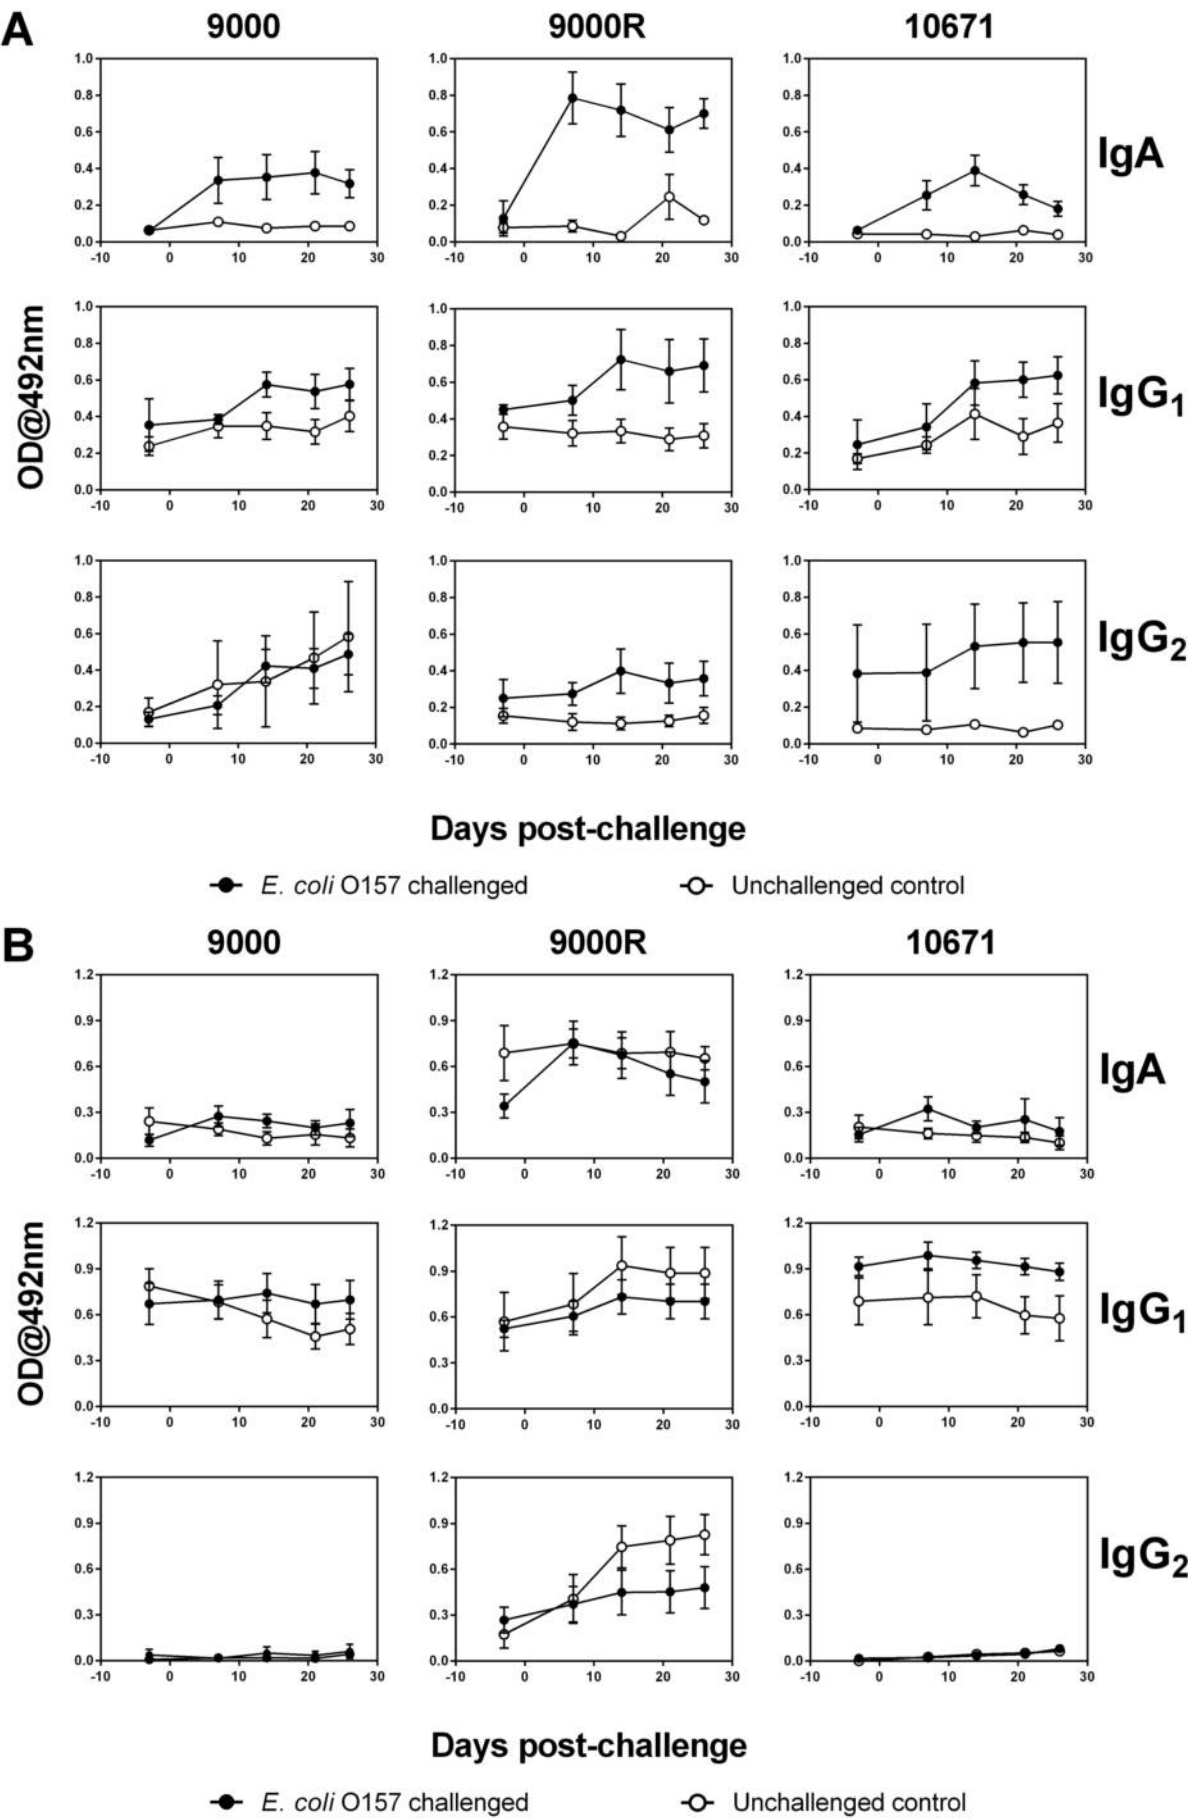

Supplement: S5 (10.1371/journal.ppat.1008003.s005) [file journal.ppat.1008003.s005]
